# Supplementary material for: Molecular Insights Into Neutrophil Biology From the Zebrafish Perspective: Lessons From CD18 Deficiency
Source: PubMed Central journal article supplement (PMC8453019; doi:10.3389/fimmu.2021.677994), 2021-09-07
Supplement: DataSheet_1.pdf [file DataSheet_1.pdf]

## *Supplementary Material*

### **Molecular Insights Into Neutrophil Biology From the Zebrafish Perspective: Lessons From CD18 Deficiency**

**Almke Bader<sup>1,2†</sup>, Jincheng Gao<sup>1,2†</sup>, Thibaud Rivière<sup>1,2</sup>, Bettina Schmid<sup>3</sup>, Barbara Walzog<sup>1,2\*</sup>, Daniela Maier-Begandt<sup>1,2\*</sup>**

**<sup>1</sup>Institute of Cardiovascular Physiology and Pathophysiology, Biomedical Center, Ludwig-Maximilians-Universität München, Planegg-Martinsried, Germany**

**<sup>2</sup>Walter Brendel Center of Experimental Medicine, University Hospital, Ludwig-Maximilians-Universität München, Munich, Germany**

**<sup>3</sup>Fish Core Unit, German Center for Neurodegenerative Diseases (DZNE), Munich, Germany**

\*Correspondence: Daniela Maier-Begandt, [Daniela.maier@lrz.uni-muenchen.de](mailto:Daniela.maier@lrz.uni-muenchen.de)  
Barbara Walzog, [Walzog@lrz.uni-muenchen.de](mailto:Walzog@lrz.uni-muenchen.de)

†These authors have contributed equally to this work



Supplementary Figure 2

CD11b

|             |                                                                                                                      |      |
|-------------|----------------------------------------------------------------------------------------------------------------------|------|
| H. sapiens  | -MAL----RVLLLTALTLCHEFNLDTENAMTF----QENARGFGQSVVQLQGSRVVVGAPQEIVAANQRGSLYQCQDYSTGSCPEIRLQVP                          | 81   |
| M. musculus | -MTL----KALLVTALALCHGFNLDTEHPMTF----QENAKGFGQNVVQLGGTSSVVVAAPQEAQAVNQTGALYQCQDYSTRCHPIPLQVP                          | 81   |
| D. rerio    | MMDWYSYISFCIFCVSQSVMAFNIDPASWKTFTGSPSQSNVAFGKVKQKDTSSLIVSDPLIQINQDKRQIYNCEVAKGTQTLNITVP                              | 90   |
|             | * . . . . . **:* ** *:. **.* : : : * . . . . . : : * : * : * : . . . * : : **                                        |      |
| H. sapiens  | VEAVNMSLGLSLAATTSPQQLLACGPTVHQTCSENTYVKGCLFLGNSLRQPPQKFPALRGCPEQEDSDIAFLIDGSGSIIPHDFRRMKE                            | 171  |
| M. musculus | PEAVNMSLGLSLAVSTVPQQLLACGPTVHQNCKENTYVNGLCYLFGSNLLRPPQPFPEALRECPQESDVIPLIDGSGSINNIIDFQMKKE                           | 171  |
| D. rerio    | SEAVNMSLGFMSVQHPQSSKLAICGPTIPKNCCTATNYRGMCFIGNSGDFGPPIPK-SKYRDC-LGQIDIAFLIDGSGSIIIGLYDFTVMKG                         | 178  |
|             | *****:*. . . . . * ****: .:*. * .*:*: .:*. * * . . . * * : **.*:***** ** **                                          |      |
| H. sapiens  | FVSTVMEQLKSKTLFSLMQYSEEFRIHFTFKFQNNPNP-RSLVKPITQLLGRTHATGIRKVVRELFNITNGARKNAFKILVITDGE                               | 260  |
| M. musculus | FVSTVMEQFKSKTLFSLMQYSEDEFRIHFTFNDFKRNPSR-RSHVSPKQLNGRTKTASGIRKVVRELFHKTNGARENAKILVITDGE                              | 260  |
| D. rerio    | FVTVNIRRFIERDAQFAIAQYSNDCDIHYFNLDLDDGTWESKVANIPYHEGGTFTASAIQKLVNLYLFTPNGGTRPSAKKILVITDGE                             | 268  |
|             | *:*. .:*. . : : : **:*: **:*:*. .: . . . * * * * * * * * * * * * * * * * * * * * * * * * * * * * * *                 |      |
| H. sapiens  | KFGDPLGYEDVPEADREGVIRYVIGVGDADRSEKSRQELNTIASKPPRDHFVQVNNFEALKTIQNLREKI FAIEGTQTGSSSFEHEM                             | 350  |
| M. musculus | KFGDPLDYKDVPEADRAGVIRYVIGVGNAFNPKQSRRELDIASKPAGEHVQVDFEALNTIQNLQEKI FAIEGTQTGTSSTFEHEM                               | 350  |
| D. rerio    | SHDRNL-LKDAASQAEKNSIVRFAIGVGKAFDYNAARELNTIASDPDITDVFVKTDFNALKNILQKLEGNIIAIEGTQTSGDSS-RMEF                            | 356  |
|             | . . . * :*. . :*: .:*. .:*. .:*. .:*. .:*. .:*. .:*. .:*. .:*. .:*. .:*. .:*. .:*. .:*. .:*. .:*. .:*. .:*. .:*. .:* |      |
| H. sapiens  | SQEGFSAITSNGPL-LSTVGSYDWAGGVFLYTSKEKSTFINMTRVDSMDMDAYLGAAAAIILRNRVQSLVLGAPRYQHIGLVAMFRONT                            | 439  |
| M. musculus | SQEGFSASITSNGPL-LGSVGSFDWAGGAFLYTSKDKVTFINTTRVDSMDMDAYLGASAVIILRNRVQSLVLGAPRYQHIGLVVFRFRNF                           | 439  |
| D. rerio    | AQDGFSTAFSSGSVLVSAVGAFAQWKGGRDNSQEG--SF----QTGSEHESYQGYSMAVATVSLTSFALIGAPRYQHRGQVTSRIGT                              | 439  |
|             | :*:*:*:*:*:* * : : : **:*: ** * : : * * . . . :* * * * * * * * * * * * * * * * * * * * * * * *                       |      |
| H. sapiens  | GMWESNANVKGTQIGAYFGASLCSVDVDSNGSDTLVLIGAPHYEQTRGGQVSVCPPLRGRARWQCDAVLYGEQGPWGRFGAALTVLGD                             | 529  |
| M. musculus | GTWEPHTSIKGSQIGSYFGASLCSVDMADGNTNLILIGAPHYKTRGGQVSVCPPLRGRARWQCEALLHGQGHWPGRFGAALTVLGD                               | 529  |
| D. rerio    | NEVQPLD-SPMPQIGSYFGAEVVCVVDLNSDSYDILLVSAPTYTESEREGKVVVYVFTSWSRFFSDVVLVGMAG-QRGRFGSSLASPAD                            | 527  |
|             | . : * * * * * * * * * * * * * * * * * * * * * * * * * * * * * * * * * * * * * * * * * * * * * * * * *                |      |
| H. sapiens  | VNGDKLTDVAIGAPGEEENRGAVALFHGTSGSGISPSHSQRIAGSKLSPRLQYFGQSLSGG-QDLTMDGLVDLTVGAQGHVLLLRQPVL                            | 618  |
| M. musculus | VNGDKLTDVAIGAPGEEENQGAVALIFYGASIASLSASHSHRIIGAHSFGLQYFGQSLSGG-KDLTMDGLMDLAVGAQGHVLLLRQPVL                            | 618  |
| D. rerio    | LNGDGYRDVVLVGAPEEGQGSIIYFNDRDGG-IISSYSQRIAGSSVSKLQYFGVSLSSQSSPDQTADSLPDIAGSAGAVLLLRQPVL                              | 616  |
|             | :** * * * * * * * * * * * * * * * * * * * * * * * * * * * * * * * * * * * * * * * * * * * * * * * * *                |      |
| H. sapiens  | RVKAIMEFNPREVARNVFECNDQVVKGEAGEVRVCLHVQKSTRDLREGQIQSVVYDLDLSDGRPHSRVAFNETKNSTRRQTVQLGLT                              | 708  |
| M. musculus | RLAATMEFSPKKVARSVFAQEQVLLKNDAGEVRVCLVRKNTKDRLREGDIIQSTVYDLDLDPVRSRIRAFDETKNTRRRTQVGLM                                | 708  |
| D. rerio    | LLETMVSYTPSKISTIQDCLIPLO----TTLTVCTMKGYR---HHRGLNAKIAYNITLDAKRQAYRAFFSAKERL-LSDVIDIGST                               | 697  |
|             | : : : * * * * * * * * * * * * * * * * * * * * * * * * * * * * * * * * * * * * * * * * * * *                          |      |
| H. sapiens  | QTCETLKLQPNCIEDPVSPIVLRLNFSLVGTPLSAFGNLRVLAEDAQRLLFTALF---PFEKNCGNDCIQDDLSITFSMSLDCLVVG                              | 795  |
| M. musculus | QTCETLKLILPDCVDDSVSPILRLNLTLVGELPRFSGNLRVLAEDAQRFFAMF---PFEKNCGNDSICQDDLSITMSAGLDTLVVG                               | 795  |
| D. rerio    | EACNNHNFSEIACPEDALNPLSNQKFTFEGLPSSQMQLRPIILPEIKTSDHVDVRVHLCKVTSQNDALLT---VGYITVGF-----                               | 777  |
|             | : * * . : : * * * : * * : * * : * * : * * : * * : * * : * * : * * : * * : * * : * * : * * : * * : * * : * * :        |      |
| H. sapiens  | GPREFNVTVTRNDGEDSYRTQVTFPFPLDLSYRKVSTLQNRQSRWRLA-CESASSTEVSGALKSTSCSINHPIFPENSEVTFNITFD                              | 884  |
| M. musculus | GPQDFNMSVTLRNDGEDSYGTQVTVYYPGSLSYRKDSASQNLTKPKWFKPAESSSSSEGHGALKSTTWNINHPIFPANSEVTFNITFD                             | 885  |
| D. rerio    | -----TYY-----                                                                                                        | 780  |
|             | :*                                                                                                                   |      |
| H. sapiens  | VDSKASLGNKLLKANVTSENNMPRTNKTEFQLELPVKYAVYVMTVSHGVSTKYLNFASENTSRVMQHQQVSNLQQRSLPISLVFLVP                              | 974  |
| M. musculus | VDSHASFNGKLLKAIIVASENNMSRTHKTKFQLELPVKYAIYVMTVSDSSIRYLNFTASEMTSKVIHQHYQFNNLQQRSLPVSVVFWIP                            | 975  |
| D. rerio    |                                                                                                                      | 780  |
| H. sapiens  | VLNQTIVWDRPQVTFSENLSSTCHTKERLPSHSDFLAELRKAPVNCISIAVCQRIQCDIPFFGIQEEFNATLKGNSLFDWYIKTSHNHL                            | 1064 |
| M. musculus | VQINNVTVWDHPQVIFSQNLSSACHTEQKSPPHSNFRDQLERTPVLNCSVAVCKRIQCDLPSFNTQEIFNVTLKGNLSFDWYIKTSHGHL                           | 1065 |
| D. rerio    | -----                                                                                                                | 780  |
| H. sapiens  | LIVSTAEILFNDSVFTLLPGQAFVRSQETETKVEPFVFNPLPLIVGSSVGGLLLLALITAALYKLGFFFRQYKDMMEGGPPGAEPQ                               | 1152 |
| M. musculus | LLVSTTEILFNDSAFALLPGQESYVRSKTEKVEPYEVHNPVPLIVGSSIGGLVLLALITAGLYKLGFFFRQYKDMMEAAPQDAPPQ                               | 1153 |
| D. rerio    | -----                                                                                                                | 780  |

Supplementary Figure 2: Sequence alignment of the human, murine, and zebrafish integrin CD11b. The I domains are shaded in gray. Identical (\*), strongly similar (:), and weakly similar (.) amino acid residues are indicated below the alignment.

Supplementary Figure 3

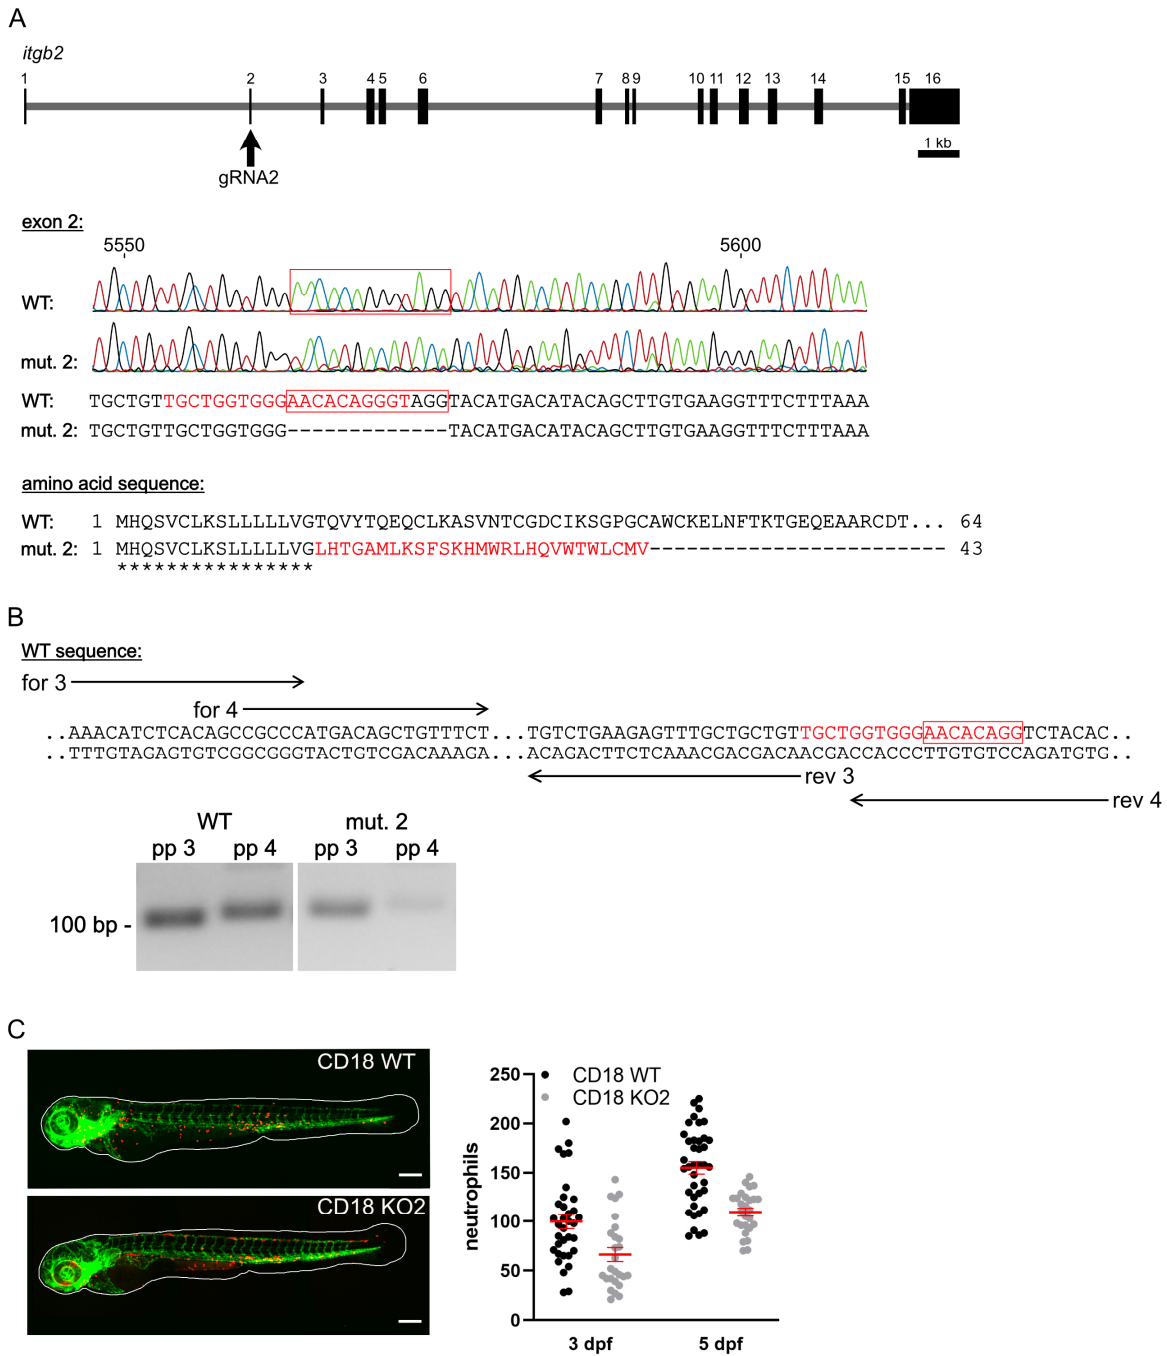

**Supplementary Figure 3: Generation of CD18 KO2 zebrafish.** (A) Upper panel: Schematic of *itgb2* gene and target exon 2 of the gRNA2. Middle panel: Sequencing traces and partial genomic sequence of WT and CD18 mutant 2 (mut. 2). Numbers indicate position within the gene. Red boxes show nucleotides deleted in the mutant. Highlighted is the target sequence of the gRNA in red. Lower panel: Predicted amino acid sequence of mutants aligned to WT sequence of the first 64 amino acids. Identical (\*) and altered (red) amino acids are indicated. (B) Upper panel: Location of primer pairs for PCR

## Supplementary Material

analysis of WT and CD18 mutant mRNA expression analysis. Reverse (rev) primer 3 binds to WT and CD18 mutant sequence, reverse primer 4 only binds the WT sequence. Lower panel: Representative image of agarose gel electrophoresis of PCR products of WT and CD18 mutant cDNA with primer pairs (pp) 3 (forward primer 3, reverse primer 3) and 4 (forward primer 4, reverse primer 4), respectively, from zebrafish larvae at 5 dpf. Expected band sizes are 101 bp for pp 3 and 112 bp for pp 4. (C) Left: Exemplary maximum intensity projections of CD18 WT and CD18 KO2 zebrafish larvae at 3 dpf. Endothelial cells are shown in green, neutrophils in red. Scale bars represent 200  $\mu$ m. Right: Total neutrophil counts in CD18 WT and CD18 KO2 zebrafish larvae at 3 dpf and 5 dpf. Mean  $\pm$  sem of  $\geq 26$  individual larvae of  $\geq 3$  independent experiments.

## Supplementary Figure 4

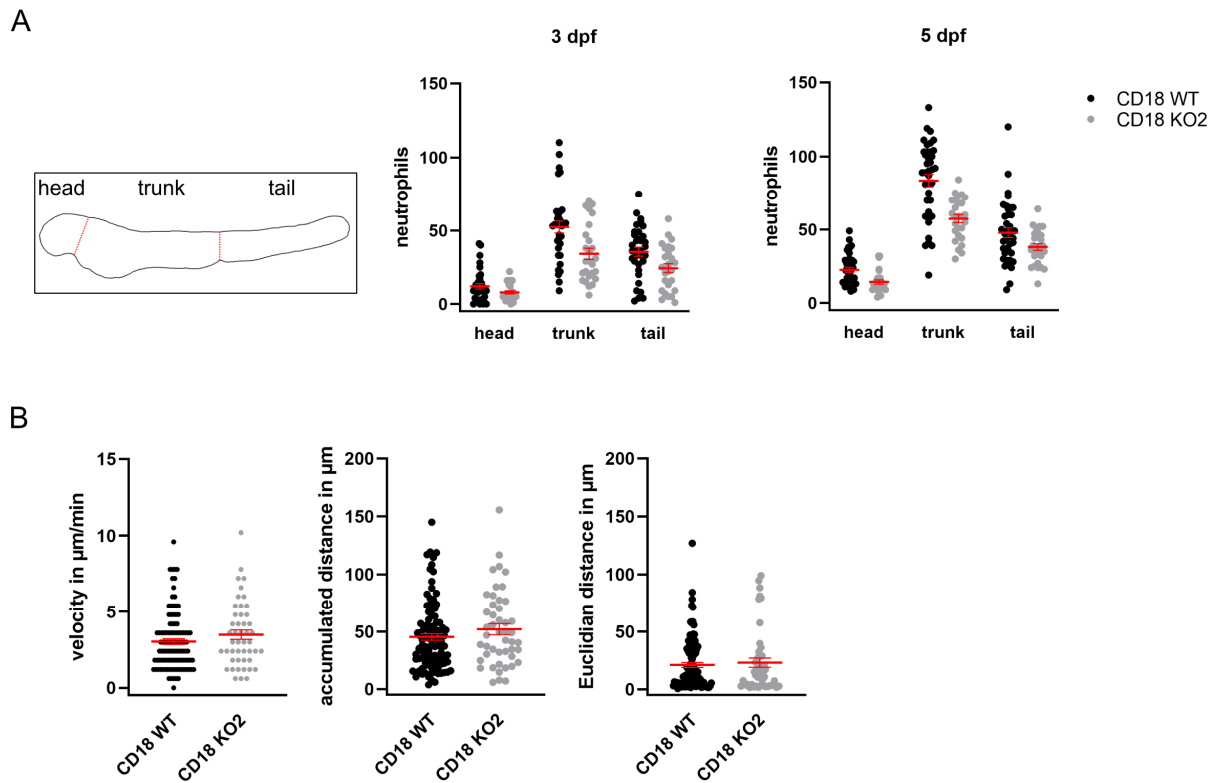

**Supplementary Figure 4: Analysis of neutrophil count and random migration at steady state in CD18 KO2.** (A) Left: Schematic of zebrafish larvae for analyzing neutrophil distribution in head, trunk, and tail. Middle and right: Distribution of neutrophils in CD18 WT and CD18 KO2 zebrafish larvae at 3 dpf and 5 dpf. Mean  $\pm$  sem of  $\geq 26$  individual larvae of  $\geq 3$  independent experiments. (B) Mean migration velocity, accumulated and Euclidian distance of individual neutrophils. Mean  $\pm$  sem of  $\geq 47$  individual neutrophils of 3 independent experiments. Unpaired t-test.

## Supplementary Figure 5

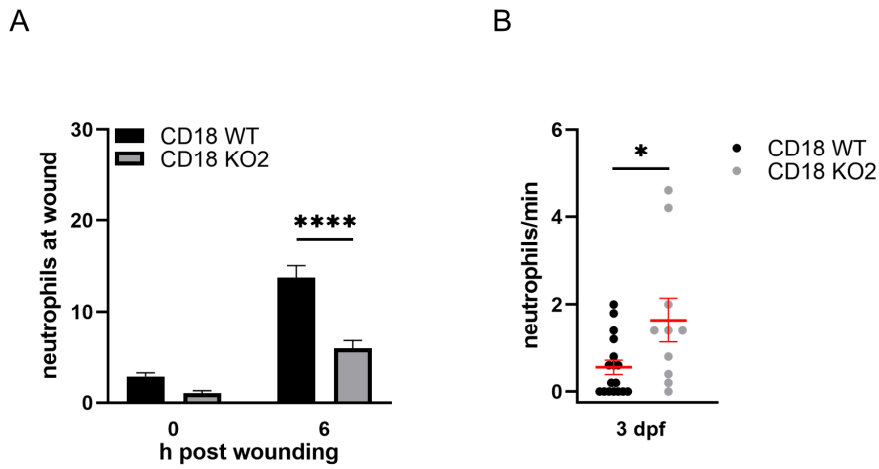

**Supplementary Figure 5: Neutrophil trafficking in CD18 KO2 zebrafish.** (A) Quantification of neutrophil numbers at the transected tail fin in 3 dpf CD18 WT and CD18 KO2 zebrafish larvae. Mean  $\pm$  sem of  $\geq 14$  individual larvae of  $\geq 2$  independent experiments. One-way ANOVA,  $p < 0.0001$ : \*\*\*\*. Similar results were obtained after 5 dpf. (B) Number of neutrophils per min in the circulation 6 h after tail fin transection in CD18 WT and CD18 KO2 zebrafish larvae at 3 dpf. Mean  $\pm$  sem of  $\geq 10$  individual larvae of 2 independent experiments. Unpaired t-test,  $p < 0.05$ : \*.

### Supplementary Videos

**Supplementary Video 1: Time-lapse confocal spinning disc maximum z projections showing random migration of neutrophils (red) in zebrafish CD18 WT and CD18 KO1 larvae at 5 dpf.** Endothelial cells are shown in green. Three representative tracks of neutrophils migrating interstitially are shown. Time lapse interval = 60 s. Frame rate = 0.02 frames/s. Scale bar represents 100  $\mu\text{m}$ .

**Supplementary Video 2: Time-lapse confocal spinning disc video microscopy showing neutrophils (red) in the posterior caudal vein 6 h post wounding in CD18 WT and CD18 KO1 zebrafish larvae at 5 dpf.** Endothelial cells are shown in green. Arrows point out neutrophils detected in the circulation. Time lapse interval = 4.5 s. Frame rate = 0.22 frames/s. Scale bar represents 200  $\mu\text{m}$ .
